# Supplementary material
Source: PubMed Central journal article supplement (PMC10015888)
Supplement: ehp10723.s001.acco.pdf [file ehp10723.s001.acco.pdf]

**Note to readers with disabilities:** *EHP* strives to ensure that all journal content is accessible to all readers. However, some figures and Supplemental Material published in *EHP* articles may not conform to [508 standards](#) due to the complexity of the information being presented. If you need assistance accessing journal content, please contact [ehp508@niehs.nih.gov](mailto:ehp508@niehs.nih.gov). Our staff will work with you to assess and meet your accessibility needs within 3 working days.

### **Supplemental Material**

#### **Birth Outcomes in Relation to Prenatal Exposure to Per- and Polyfluoroalkyl Substances and Stress in the Environmental Influences on Child Health Outcomes (ECHO) Program**

Amy M. Padula, Xuejuan Ning, Shivani Bakre, Emily S. Barrett, Tracy Bastain, Deborah H. Bennett, Michael S. Bloom, Carrie V. Breton, Anne L. Dunlop, Stephanie M. Eick, Assiamira Ferrara, Abby Fleisch, Sarah Geiger, Dana E. Goin, Kurunthachalam Kannan, Margaret R. Karagas, Susan Korrick, John D. Meeker, Rachel Morello-Frosch, Thomas G. O'Connor, Emily Oken, Morgan Robinson, Megan E. Romano, Susan L. Schantz, Rebecca J. Schmidt, Anne P. Starling, Yeyi Zhu, Ghassan B. Hamra, Tracey J. Woodruff, and the program collaborators for Environmental influences on Child Health Outcomes

#### **Table of Contents**

**Table S1.** Characteristics of study population among selected ECHO cohorts (N=3339).

**Table S2.** Number of participants with measured PFAS (ng/mL) and percent above limit of detection by analyte by cohort in 11 selected ECHO cohorts.

**Table S3.** PFAS (ng/mL) distribution by year, cohort, perceived stress scale and limit of detection in 11 selected ECHO cohorts.

**Table S4.** Spearman correlation coefficients of PFAS by trimester in 3 selected ECHO cohorts (CiOB, MARBLES, PETALS).

**Table S5.** Serum concentrations of PFAS (ng/ml) study population among selected ECHO cohorts (N=3339) and comparison to the National Health And Nutrition Examination Surveys (NHANES) during the study period.

**Table S6.** Distribution of Perceived Stress Scale (PSS) by race/ethnicity.

**Table S7.** Associations of prenatal natural log-transformed PFAS concentrations (ng/mL) and risk of adverse birth outcomes stratified by trimester of exposure in selected ECHO cohorts.

**Table S8.** Associations of quartiles of prenatal PFAS concentrations (ng/mL) and risk of adverse birth outcomes in selected ECHO cohorts.

**Table S9.** Mixed versus fixed effects models of continuous measures of prenatal natural log-transformed PFAS (ng/mL) concentrations and birthweight-for-gestational age Z-scores in selected ECHO cohorts.

**Table S10.** Associations of prenatal natural log-transformed PFAS concentrations (ng/mL) and risk of adverse birth outcomes additionally adjusted for tobacco smoke exposure (via maternal smoking or second-hand smoke) in selected ECHO cohorts.

**Table S11.** Associations of non-log transformed prenatal PFAS concentrations (ng/mL) and birthweight in selected ECHO cohorts.

**Figure S1.** Flow chart for eligibility of study population of selected ECHO cohorts.

**Figure S2.** Raw (above) and natural log transformed (below) distributions of PFAS (ng/mL) in selected ECHO cohorts (N=3339). See Table S5 for corresponding numeric data.

**Figure S3.** Directed Acyclic Graph.

**Figure S4.** Spearman correlation for PFAS concentrations (ng/mL) in selected ECHO cohorts (N=3339).

**Figure S5.** Associations of prenatal natural log transformed PFAS concentrations (ng/mL) and risk of adverse birth outcomes with each cohort removed one at a time in selected ECHO cohorts (N=3339).

**Figure S6.** Associations between second, third and fourth quartiles of maternal PFAS (ng/mL) compared to the first quartile (lowest) and risk of adverse birth outcomes in 11 selected ECHO cohorts. Shapes represent point estimate, and lines represent corresponding 95% confidence intervals. See Table S8 for corresponding numeric data.

## References

Table S1. Characteristics of study population among selected ECHO cohorts (N=3339)

| <b>Cohort Name</b>                                                                | <b>N</b> | <b>Location</b>         | <b>Years of birth</b> | <b>Trimester of PFAS sample</b>                     | <b>Media</b> | <b>PFAS lab</b>                                                                                  | <b>Perceived Stress Scale</b> |
|-----------------------------------------------------------------------------------|----------|-------------------------|-----------------------|-----------------------------------------------------|--------------|--------------------------------------------------------------------------------------------------|-------------------------------|
| Chemicals in Our Bodies (CiOB)                                                    | 402      | San Francisco, CA       | 2014-2019             | 2 <sup>nd</sup> , 3 <sup>rd</sup>                   | Serum        | California Department of Toxic Substances Control (Eick et al. 2021)                             | PSS4                          |
| Illinois Kids Development Studies (IKIDS)                                         | 184      | Urbana - Champaign, IL  | 2014-2016             | 2 <sup>nd</sup>                                     | Serum        |                                                                                                  | PSS10                         |
| Project Viva                                                                      | 842      | Boston, MA              | 1999-2002             | 1 <sup>st</sup>                                     | Plasma       | Centers for Disease Control and Prevention (Kato et al. 2011; Oh et al. 2021; Sagiv et al. 2018) | none                          |
| Healthy Start                                                                     | 652      | CO                      | 2010-2014             | 2 <sup>nd</sup> , 3 <sup>rd</sup>                   | Serum        |                                                                                                  | PSS10                         |
| New Hampshire Birth Cohort Study (NHBCS)                                          | 324      | Lebanon and Concord, NH | 2010-2013             | 2 <sup>nd</sup> , 3 <sup>rd</sup>                   | Plasma       |                                                                                                  | none                          |
| Markers of Autism Risk in Babies Learning Early Signs (MARBLES)                   | 39       | Northern CA             | 2009-2014             | 1 <sup>st</sup> , 2 <sup>nd</sup> , 3 <sup>rd</sup> | Serum        |                                                                                                  | PSS10                         |
| Emory (Atlanta)                                                                   | 424      | Atlanta, GA             | 2015-2018             | 1 <sup>st</sup> , 2 <sup>nd</sup>                   | Serum        | Human Health Exposure Analysis Resource (HHEAR) (Honda et al. 2018)                              | PSS14                         |
| Maternal And Developmental Risks from Environmental and social Stressors (MADRES) | 347      | Los Angeles, CA         | 2016-2019             | 1 <sup>st</sup> , 2 <sup>nd</sup> , 3 <sup>rd</sup> | Serum        |                                                                                                  | PSS10                         |
| Pregnancy and Environment And Lifestyle Study (PETALS)                            | 124      | CA                      | 2014-2016             | 1 <sup>st</sup> , 2 <sup>nd</sup>                   | Serum        |                                                                                                  | PSS10                         |
| Rochester                                                                         | 35       | Rochester, NY           | 2017-2019             | 2 <sup>nd</sup>                                     | Serum        |                                                                                                  | PSS14                         |
| Kaiser Permanente Research Bank Pregnancy Cohort (KPRB-PC)                        | 13       | CA                      | 2014                  | 1 <sup>st</sup>                                     | Serum        |                                                                                                  | none                          |

Table S2. Number of participants with measured PFAS (ng/mL) and percent above limit of detection by analyte by cohort in 11 selected ECHO cohorts

| PFAS    | Total N<br>(%>LOD) | Cohort          |                  |                         |                          |                  |                   |                    |                   |                   |                     |                   |
|---------|--------------------|-----------------|------------------|-------------------------|--------------------------|------------------|-------------------|--------------------|-------------------|-------------------|---------------------|-------------------|
|         |                    | CiOB<br>(N=402) | IKIDS<br>(N=184) | Project Viva<br>(N=842) | Healthy Start<br>(N=652) | NHBCS<br>(N=324) | MARBLES<br>(N=39) | Atlanta<br>(N=424) | MADRES<br>(N=347) | PETALS<br>(N=124) | Rochester<br>(N=35) | KPRB-PC<br>(N=13) |
| PFOA    | 3954 (88.0%)       | 474 (99.8%)     | 184 (100.0%)     | 842 (100.0%)            | 652 (99.7%)              | 648 (51.7%)      | 65 (100.0%)       | 437 (97.3%)        | 347 (65.4%)       | 244 (95.1%)       | 35 (100.0%)         | 26 (50.0%)        |
| PFOS    | 3954 (99.7%)       | 474 (100.0%)    | 184 (100.0%)     | 842 (100.0%)            | 652 (99.4%)              | 648 (100.0%)     | 65 (100.0%)       | 437 (98.6%)        | 347 (100.0%)      | 244 (100.0%)      | 35 (100.0%)         | 26 (100.0%)       |
| PFNA    | 3605 (95.9%)       | 474 (98.7%)     | 184 (98.9%)      | 842 (98.3%)             | 652 (98.3%)              | 324 (100.0%)     | 65 (100.0%)       | 437 (96.8%)        | 347 (70.9%)       | 232 (100.0%)      | 35 (100.0%)         | 13 (100.0%)       |
| PFHxS   | 3605 (99.2%)       | 474 (100.0%)    | 184 (98.9%)      | 842 (99.3%)             | 652 (98.6%)              | 324 (100.0%)     | 65 (100.0%)       | 437 (97.5%)        | 347 (100.0%)      | 232 (100.0%)      | 35 (100.0%)         | 13 (100.0%)       |
| PFDA    | 3510 (64.2%)       | 474 (75.7%)     | 184 (73.9%)      | 842 (45.8%)             | 652 (65.3%)              | 324 (88.0%)      | 65 (84.6%)        | 342 (48.5%)        | 347 (57.6%)       | 232 (87.9%)       | 35 (65.7%)          | 13 (100.0%)       |
| NMFOSAA | 3510 (59.8%)       | 474 (88.0%)     | 184 (83.7%)      | 842 (100.0%)            | 652 (28.8%)              | 324 (41.7%)      | 65 (63.1%)        | 342 (49.7%)        | 347 (10.4%)       | 232 (40.1%)       | 35 (42.9%)          | 13 (69.2%)        |
| PFUNDA  | 2016 (55.4%)       | 474 (80.8%)     | 184 (71.2%)      |                         |                          | 324 (43.8%)      | 65 (55.4%)        | 342 (43.3%)        | 347 (9.5%)        | 232 (92.7%)       | 35 (57.1%)          | 13 (69.2%)        |
| PFPEA   | 597 (67.2%)        |                 |                  |                         |                          |                  |                   | 342 (47.4%)        |                   | 220 (99.5%)       | 35 (57.1%)          |                   |
| EtFOSAA | 2813 (32.8%)       | 474 (8.2%)      | 184 (9.2%)       | 842 (99.6%)             | 651 (0.8%)               |                  | 65 (0.0%)         | 342 (5.0%)         |                   | 220 (2.3%)        | 35 (2.9%)           |                   |
| PFBS    | 1602 (4.4%)        | 474 (2.1%)      | 184 (1.6%)       |                         |                          |                  |                   | 342 (14.0%)        | 347 (1.4%)        | 220 (0.9%)        | 35 (8.6%)           |                   |
| PFDODA  | 1320 (5.9%)        | 474 (3.8%)      | 184 (4.9%)       |                         |                          |                  | 65 (24.6%)        | 342 (2.0%)         |                   | 220 (12.3%)       | 35 (2.9%)           |                   |
| PFHPA   | 1602 (10.9%)       | 474 (15.0%)     | 184 (19.6%)      |                         |                          |                  |                   | 342 (14.9%)        | 347 (0.0%)        | 220 (5.9%)        | 35 (11.4%)          |                   |
| PFHXA   | 597 (28.1%)        |                 |                  |                         |                          |                  |                   | 342 (47.4%)        |                   | 220 (2.7%)        | 35 (0.0%)           |                   |
| PFOSA   | 3096 (3.8%)        | 474 (3.4%)      | 184 (14.7%)      | 842 (8.8%)              | 652 (0.3%)               |                  |                   | 342 (0.0%)         | 347 (0.0%)        | 220 (0.0%)        | 35 (0.0%)           |                   |

PFAS (14) measured in ECHO cohorts: Perfluorooctanoic acid (PFOA); Perfluorooctanesulfonic acid (PFOS); Perfluorononanoic acid (PFNA); Perfluorohexane sulfonic acid (PFHxS); Perfluorodecanoic acid (PFDA); N-methyl Perfluorooctane sulfonamido acetic acid (NMFOSAA); Perfluoroundecanoic acid (PFUnDA); Perfluoro-n-pentanoic acid (PFPEA); 2-(N-Ethyl-perfluorooctane sulfonamido) acetic acid (EtFOSAA); Perfluorobutanesulfonic acid (PFBS); Perfluorooctanesulfonate (PFDODA); Perfluoroheptanoic acid (PFHPA); Perfluorohexanoic acid (PFHXA); Perfluorooctanesulfonamide (PFOSA)

Chemicals in Our Bodies (CiOB); Illinois Kids Development Studies (IKIDS); New Hampshire Birth Cohort Study (NHBCS); Markers of Autism Risk in Babies Learning Early Signs (MARBLES); Emory (Atlanta); Maternal And Developmental Risks from Environmental and social Stressors (MADRES); Pregnancy and Environment And Lifestyle Study (PETALS); Kaiser Permanente Research Bank Pregnancy Cohort (KPRB-PC).

Table S3. PFAS (ng/mL) distribution by year, cohort, perceived stress scale and limit of detection in 11 selected ECHO cohorts

|               | <b>PFOA, median (IQR)</b><br>[range of LOD <sup>a</sup> ] | <b>PFOS, median (IQR)</b><br>[range of LOD <sup>a</sup> ] | <b>PFNA, median (IQR)</b><br>[range of LOD <sup>a</sup> ] | <b>PFHxS, median (IQR)</b><br>[range of LOD <sup>a</sup> ] | <b>PFDA, median (IQR)</b><br>[range of LOD <sup>a</sup> ] |
|---------------|-----------------------------------------------------------|-----------------------------------------------------------|-----------------------------------------------------------|------------------------------------------------------------|-----------------------------------------------------------|
| <b>Cohort</b> |                                                           |                                                           |                                                           |                                                            |                                                           |
| CiOB          | 0.8 (0.5, 1.2) (n=397)                                    | 1.9 (1.1, 3.1) (n=397)                                    | 0.3 (0.2, 0.4) (n=397)                                    | 0.4 (0.2, 0.6) (n=397)                                     | 0.1 (0.1, 0.2) (n=397)                                    |
|               | [0.06, 0.13]                                              | [0.06, 0.07]                                              | [0.04, 0.06]                                              | [0.02]                                                     | [0.06, 0.08]                                              |
| IKIDS         | 0.9 (0.5, 1.4) (n=184)                                    | 2.6 (1.6, 4.1) (n=184)                                    | 0.3 (0.2, 0.5) (n=184)                                    | 0.6 (0.3, 0.9) (n=184)                                     | 0.1 (0.0, 0.2) (n=184)                                    |
|               | [0.06]                                                    | [0.06]                                                    | [0.06]                                                    | [0.02]                                                     | [0.06]                                                    |
| Project Viva  | 5.7 (4.2, 7.9) (n=842)                                    | 25.7 (18.4, 35.6) (n=842)                                 | 0.7 (0.5, 0.9) (n=842)                                    | 2.5 (1.6, 3.8) (n=842)                                     | 0.1 (0.1, 0.3) (n=842)                                    |
|               | [0.1]                                                     | [0.2]                                                     | [0.1]                                                     | [0.1]                                                      | [0.1]                                                     |
| Healthy Start | 1.2 (0.8, 1.7) (n=652)                                    | 2.4 (1.5, 3.7) (n=652)                                    | 0.4 (0.3, 0.6) (n=652)                                    | 0.7 (0.5, 1.2) (n=652)                                     | 0.1 (0.1, 0.2) (n=652)                                    |
|               | [0.1]                                                     | [0.1]                                                     | [0.1]                                                     | [0.1]                                                      | [0.1]                                                     |
| NHBCS         | 1.4 (1.0, 2.0) (n=300)                                    | 2.3 (1.5, 3.2) (n=300)                                    | 0.6 (0.4, 0.8) (n=300)                                    | 0.7 (0.5, 1.1) (n=300)                                     | 0.2 (0.1, 0.2) (n=300)                                    |
|               | [0.1]                                                     | [0.1]                                                     | [0.1]                                                     | [0.1]                                                      | [0.1]                                                     |
| MARBLES       | 0.9 (0.7, 1.4) (n=37)                                     | 2.8 (2.3, 4.8) (n=37)                                     | 0.5 (0.4, 0.8) (n=37)                                     | 0.5 (0.3, 1.0) (n=37)                                      | 0.1 (0.1, 0.2) (n=37)                                     |
|               | [0.1]                                                     | [0.1]                                                     | [0.1]                                                     | [0.1]                                                      | [0.1]                                                     |
| Atlanta       | 0.7 (0.5, 1.1) (n=424)                                    | 2.2 (1.4, 3.2) (n=424)                                    | 0.3 (0.2, 0.4) (n=424)                                    | 1.1 (0.7, 1.5) (n=424)                                     | <LOD (<LOD, 0.1) (n=342)                                  |
|               | [0.04, 0.05]                                              | [0.02, 0.2]                                               | [0.02, 0.1]                                               | [0.02, 0.2]                                                | [0.04]                                                    |
| MADRES        | 0.1 (<LOD, 0.4) (n=331)                                   | 1.3 (1.0, 1.9) (n=331)                                    | 0.1 (<LOD, 0.2) (n=331)                                   | 1.1 (0.8, 1.5) (n=331)                                     | <LOD (<LOD, 0.1) (n=331)                                  |
|               | [0.04]                                                    | [0.02]                                                    | [0.02]                                                    | [0.02]                                                     | [0.04]                                                    |
| PETALS        | 0.8 (0.5, 1.2) (n=124)                                    | 2.4 (1.7, 3.2) (n=124)                                    | 0.4 (0.3, 0.5) (n=124)                                    | 1.2 (0.9, 1.5) (n=124)                                     | 0.1 (<LOD, 0.1) (n=124)                                   |
|               | [0.02, 0.1]                                               | [0.02, 0.1]                                               | [0.03, 0.1]                                               | [0.02, 0.1]                                                | [0.02, 0.1]                                               |
| Rochester     | 0.5 (0.4, 0.7) (n=35)                                     | 2.3 (1.4, 3.1) (n=35)                                     | 0.2 (0.2, 0.3) (n=35)                                     | 1.8 (1.3, 2.3) (n=35)                                      | <LOD (<LOD, 0.1) (n=35)                                   |
|               | [0.02]                                                    | [0.02]                                                    | [0.03]                                                    | [0.02]                                                     | [0.02]                                                    |
| KPRB-PC       | 1.2 (1.0, 1.5) (n=13)                                     | 1.7 (1.5, 2.2) (n=13)                                     | 0.6 (0.5, 0.7) (n=13)                                     | 0.5 (0.4, 0.9) (n=13)                                      | 0.1 (0.1, 0.2) (n=13)                                     |
|               | [0.1]                                                     | [0.1]                                                     | [0.1]                                                     | [0.1]                                                      | [0.1]                                                     |
| <b>Year</b>   |                                                           |                                                           |                                                           |                                                            |                                                           |
| 1999          | 5.1 (3.8, 6.8) (n=28)                                     | 28.1 (19.5, 36.9) (n=28)                                  | 0.7 (0.4, 0.8) (n=28)                                     | 2.0 (1.5, 3.7) (n=28)                                      | 0.1 (0.1, 0.3) (n=28)                                     |
| 2000          | 6.0 (4.4, 8.2) (n=330)                                    | 28.7 (20.8, 38.1) (n=330)                                 | 0.7 (0.5, 1.0) (n=330)                                    | 2.6 (1.8, 3.9) (n=330)                                     | 0.1 (0.1, 0.3) (n=330)                                    |
| 2001          | 5.8 (4.2, 8.5) (n=310)                                    | 24.8 (18.6, 35.5) (n=310)                                 | 0.7 (0.5, 0.9) (n=310)                                    | 2.6 (1.7, 4.0) (n=310)                                     | 0.1 (0.1, 0.3) (n=310)                                    |
| 2002          | 5.3 (3.5, 7.3) (n=170)                                    | 21.3 (14.2, 29.0) (n=170)                                 | 0.6 (0.4, 0.9) (n=170)                                    | 2.2 (1.3, 3.2) (n=170)                                     | 0.1 (0.1, 0.3) (n=170)                                    |
| 2003          | 5.3 (2.5, 7.3) (n<5)                                      | 25.0 (12.5, 35.5) (n<5)                                   | 0.6 (0.3, 1.0) (n<5)                                      | 2.3 (1.6, 2.7) (n<5)                                       | 0.2 (0.1, 0.3) (n<5)                                      |

|                                       |                         |                           |                         |                         |                          |
|---------------------------------------|-------------------------|---------------------------|-------------------------|-------------------------|--------------------------|
| 2009                                  | 1.5 (0.9, 2.5) (n=9)    | 4.1 (3.7, 5.6) (n=9)      | 0.7 (0.6, 0.8) (n=9)    | 0.7 (0.4, 1.2) (n=9)    | 0.2 (0.1, 0.3) (n=9)     |
| 2010                                  | 1.7 (1.1, 2.2) (n=122)  | 3.2 (2.1, 5.2) (n=122)    | 0.5 (0.4, 0.8) (n=122)  | 0.9 (0.5, 1.5) (n=122)  | 0.2 (0.1, 0.2) (n=122)   |
| 2011                                  | 1.4 (0.9, 1.9) (n=225)  | 2.7 (1.7, 3.8) (n=225)    | 0.5 (0.4, 0.7) (n=225)  | 0.8 (0.5, 1.4) (n=225)  | 0.2 (0.1, 0.2) (n=225)   |
| 2012                                  | 1.2 (0.8, 1.7) (n=283)  | 2.3 (1.5, 3.3) (n=283)    | 0.5 (0.3, 0.7) (n=283)  | 0.7 (0.4, 1.2) (n=283)  | 0.1 (0.1, 0.2) (n=283)   |
| 2013                                  | 1.0 (0.8, 1.6) (n=243)  | 2.0 (1.4, 2.9) (n=243)    | 0.4 (0.3, 0.6) (n=243)  | 0.7 (0.4, 1.0) (n=243)  | 0.1 (0.1, 0.2) (n=243)   |
| 2014                                  | 1.1 (0.7, 1.6) (n=204)  | 2.3 (1.4, 3.6) (n=204)    | 0.4 (0.2, 0.6) (n=204)  | 0.6 (0.4, 1.1) (n=204)  | 0.1 (0.1, 0.2) (n=204)   |
| 2015                                  | 0.8 (0.5, 1.2) (n=278)  | 2.5 (1.6, 3.7) (n=278)    | 0.4 (0.3, 0.5) (n=278)  | 0.8 (0.4, 1.4) (n=278)  | 0.1 (0.1, 0.2) (n=278)   |
| 2016                                  | 0.8 (0.5, 1.3) (n=287)  | 2.2 (1.4, 3.3) (n=287)    | 0.3 (0.2, 0.5) (n=287)  | 0.8 (0.4, 1.3) (n=287)  | 0.1 (<LOD, 0.2) (n=255)  |
| 2017                                  | 0.5 (0.3, 0.9) (n=283)  | 1.6 (1.0, 2.5) (n=283)    | 0.2 (0.1, 0.3) (n=283)  | 0.8 (0.3, 1.3) (n=283)  | 0.1 (<LOD, 0.2) (n=263)  |
| 2018                                  | 0.4 (0.1, 0.6) (n=286)  | 1.4 (1.0, 2.0) (n=286)    | 0.2 (0.1, 0.3) (n=286)  | 0.9 (0.5, 1.3) (n=286)  | 0.1 (<LOD, 0.1) (n=286)  |
| 2019                                  | 0.1 (<LOD, 0.4) (n=98)  | 1.2 (0.8, 1.8) (n=98)     | 0.1 (<LOD, 0.2) (n=98)  | 1.0 (0.7, 1.4) (n=98)   | <LOD (<LOD, 0.1) (n=98)  |
| Missing                               | 0.7 (0.4, 1.0) (n=179)  | 2.1 (1.5, 3.1) (n=179)    | 0.3 (0.2, 0.4) (n=179)  | 1.1 (0.7, 1.5) (n=179)  | <LOD (<LOD, 0.1) (n=149) |
| <b>Perceived Stress Scale T-score</b> |                         |                           |                         |                         |                          |
| Below median                          | 0.7 (0.4, 1.2) (n=1003) | 2.0 (1.3, 3.2) (n=1003)   | 0.3 (0.2, 0.4) (n=1003) | 0.9 (0.5, 1.4) (n=1003) | 0.1 (<LOD, 0.1) (n=961)  |
| Above median                          | 0.8 (0.5, 1.3) (n=1006) | 2.1 (1.3, 3.2) (n=1006)   | 0.3 (0.2, 0.5) (n=1006) | 0.7 (0.4, 1.2) (n=1006) | 0.1 (0.1, 0.2) (n=971)   |
| Missing PSS                           | 3.9 (1.7, 6.6) (n=1330) | 17.3 (3.1, 29.2) (n=1330) | 0.6 (0.4, 0.9) (n=1330) | 1.8 (0.9, 3.0) (n=1330) | 0.1 (0.1, 0.3) (n=1325)  |

<sup>a</sup> Multiple limits of detection (LOD) presented where batches had different LODs with the same cohort and lab. PFAS, per- and polyfluoroalkyl substances; PFOA, perfluorooctanoic acid; PFOS, perfluorooctanesulfonic acid; PFNA, perfluorononanoic acid; PFHxS, perfluorohexane sulfonic acid; PFDA, perfluorodecanoic acid. Chemicals in Our Bodies (CiOB); Illinois Kids Development Studies (IKIDS); New Hampshire Birth Cohort Study (NHBCS); Markers of Autism Risk in Babies Learning Early Signs (MARBLES); Emory (Atlanta); Maternal And Developmental Risks from Environmental and social Stressors (MADRES); Pregnancy and Environment And Lifestyle Study (PETALS); Kaiser Permanente Research Bank Pregnancy Cohort (KPRB-PC).

Table S4. Spearman correlation coefficients of PFAS by trimester in 3 selected ECHO cohorts (CiOB, MARBLES, PETALS)

| <b>PFAS</b> | <b>1<sup>st</sup>-2<sup>nd</sup> (N=63)</b> | <b>2<sup>nd</sup>-3<sup>rd</sup> (N=82)</b> | <b>1<sup>st</sup>-3<sup>rd</sup> (N=11)</b> |
|-------------|---------------------------------------------|---------------------------------------------|---------------------------------------------|
| PFOA        | 0.96                                        | 0.90                                        | 0.95                                        |
| PFOS        | 0.94                                        | 0.90                                        | 0.92                                        |
| PFNA        | 0.92                                        | 0.84                                        | 0.92                                        |
| PFHxS       | 0.90                                        | 0.85                                        | 0.85                                        |
| PFDA        | 0.91                                        | 0.82                                        | 0.53                                        |

PFAS, per- and polyfluoroalkyl substances; PFOA, perfluorooctanoic acid; PFOS, perfluorooctanesulfonic acid; PFNA, perfluorononanoic acid; PFHxS, perfluorohexane sulfonic acid; PFDA, perfluorodecanoic acid. Chemicals in Our Bodies (CiOB); Markers of Autism Risk in Babies Learning Early Signs (MARBLES); Pregnancy and Environment And Lifestyle Study (PETALS).

Table S5. Serum concentrations of PFAS (ng/ml) study population among selected ECHO cohorts (N=3339) and comparison to the National Health And Nutrition Examination Surveys (NHANES) during the study period.

| PFAS  | ECHO 1999-2019   |                          |                 |                  |                  |                  |                  | NHANES                  |                                   |                                   |
|-------|------------------|--------------------------|-----------------|------------------|------------------|------------------|------------------|-------------------------|-----------------------------------|-----------------------------------|
|       | Percent detected | Highest LOD <sup>a</sup> | Percentiles     |                  |                  |                  |                  | Geometric Mean (95% CI) | 2011-2012 Geometric Mean (95% CI) | 2017-2018 Geometric Mean (95% CI) |
|       |                  |                          | 5 <sup>th</sup> | 25 <sup>th</sup> | 50 <sup>th</sup> | 75 <sup>th</sup> | 95 <sup>th</sup> |                         |                                   |                                   |
| PFOA  | 96               | 0.1                      | 0.1             | 0.6              | 1.2              | 2.9              | 8.7              | 1.15 (1.12, 1.22)       | 2.08 (1.95, 2.22)                 | 1.42 (1.33, 1.52)                 |
| PFOS  | 100              | 0.2                      | 0.7             | 1.6              | 2.8              | 9.8              | 38.7             | 3.86 (3.70, 4.03)       | 6.31 (5.84, 6.82)                 | 4.25 (3.90, 4.62)                 |
| PFNA  | 96               | 0.1                      | 0.1             | 0.2              | 0.4              | 0.7              | 1.2              | 0.35 (0.34, 0.36)       | 0.88 (0.80, 0.97)                 | 0.41 (0.36, 0.46)                 |
| PFHxS | 99               | 0.1                      | 0.2             | 0.6              | 1.0              | 1.9              | 4.8              | 1.02 (0.99, 1.05)       | 1.28 (1.15, 1.43)                 | 1.08 (1.00, 1.18)                 |
| PFDA  | 63               | 0.1                      | <LOD            | 0.1              | 0.1              | 0.2              | 0.4              | 0.11 (0.10, 0.11)       | 0.199 (1.15, 1.43)                | 0.19 (0.18, 0.21)                 |

<sup>a</sup>Multiple LOD are presented in Table S3 where batches had different LODs with the same cohort and lab.

CI, confidence interval; LOD, limit of detection; NHANES, National Health and Nutrition Examination Survey; proportion of results below limit of detection was too high to provide a valid result; PFAS, per- and polyfluoroalkyl substances; PFOA, perfluorooctanoic acid; PFOS, perfluorooctanesulfonic acid; PFNA, perfluorononanoic acid; PFHxS, perfluorohexane sulfonic acid; PFDA, perfluorodecanoic acid.



Table S6. Distribution of Perceived Stress Scale (PSS) by race/ethnicity

| <b>Factor</b>               | <b>Non-Hispanic White</b> | <b>Non-Hispanic Black</b> | <b>Non-Hispanic Asian</b> | <b>Non-Hispanic other</b> | <b>Hispanic/Latina</b> | <b>Missing/Unknown</b> |
|-----------------------------|---------------------------|---------------------------|---------------------------|---------------------------|------------------------|------------------------|
| <b>N</b>                    | 1687                      | 509                       | 193                       | 96                        | 653                    | 201                    |
| <b>PSS t-score category</b> |                           |                           |                           |                           |                        |                        |
| <b>&lt;Median (50.6)</b>    | 362 (48.3%)               | 186 (50.1%)               | 48 (35.0%)                | 24 (41.4%)                | 285 (54.4%)            | 98 (57.6%)             |
| <b>&gt;=Median (50.6)</b>   | 387 (51.7%)               | 185 (49.9%)               | 89 (65.0%)                | 34 (58.6%)                | 239 (45.6%)            | 72 (42.4%)             |
| <b>Missing/Unknown</b>      | 938                       | 138                       | 56                        | 38                        | 129                    | 31                     |

Table S7. Associations of prenatal natural log-transformed PFAS concentrations (ng/mL) and risk of adverse birth outcomes stratified by trimester of exposure in selected ECHO cohorts

| PFAS            | Birthweight-for-gestational-age z-scores |                      | Small-for-gestational-age <sup>a</sup> |                   | Large-for-gestational-age <sup>a</sup> |                   | Term low birth weight |                    | Preterm birth |                   | Gestational age at birth (weeks) |                     |
|-----------------|------------------------------------------|----------------------|----------------------------------------|-------------------|----------------------------------------|-------------------|-----------------------|--------------------|---------------|-------------------|----------------------------------|---------------------|
|                 | N                                        | β (95% CI)           | N                                      | OR (95% CI)       | N                                      | OR (95% CI)       | N                     | OR (95% CI)        | N             | OR 95% CI         | N                                | β (95% CI)          |
| PFOA            |                                          |                      |                                        |                   |                                        |                   |                       |                    |               |                   |                                  |                     |
| 1 <sup>st</sup> | 1195                                     | -0.18 (-0.38, 0.02)  | 1035                                   | 1.21 (0.61, 2.39) | 1082                                   | 0.87 (0.47, 1.61) | 978                   | 2.57 (0.39, 17.05) | 1176          | 0.90 (0.48, 1.69) | 1197                             | -0.28 (-0.67, 0.12) |
| 2 <sup>nd</sup> | 1181                                     | -0.16 (-0.35, 0.04)  | 1050                                   | 0.96 (0.50, 1.84) | 1066                                   | 0.77 (0.41, 1.45) | 951                   | 1.00 (0.23, 4.42)  | 1081          | 1.78 (0.90, 3.54) | 1182                             | -0.33 (-0.66, 0.01) |
| 3 <sup>rd</sup> | 854                                      | -0.12 (-0.34, 0.11)  | 782                                    | 0.87 (0.40, 1.86) | 762                                    | 0.53 (0.21, 1.32) | 606                   | 1.83 (0.26, 12.94) | 836           | 2.28 (0.89, 5.87) | 854                              | -0.01 (-0.33, 0.30) |
| PFOS            |                                          |                      |                                        |                   |                                        |                   |                       |                    |               |                   |                                  |                     |
| 1 <sup>st</sup> | 1195                                     | -0.29 (-0.55, -0.03) | 1035                                   | 2.03 (0.89, 4.62) | 1082                                   | 0.99 (0.46, 2.13) | 978                   | 5.30 (0.81, 34.74) | 1176          | 1.24 (0.54, 2.85) | 1197                             | -0.38 (-0.89, 0.13) |
| 2 <sup>nd</sup> | 1181                                     | -0.04 (-0.25, 0.16)  | 1050                                   | 0.67 (0.34, 1.31) | 1066                                   | 1.07 (0.53, 2.16) | 951                   | 0.92 (0.16, 5.40)  | 1081          | 1.48 (0.66, 3.30) | 1182                             | -0.17 (-0.53, 0.19) |
| 3 <sup>rd</sup> | 854                                      | -0.20 (-0.46, 0.06)  | 782                                    | 0.88 (0.38, 2.04) | 762                                    | 0.43 (0.16, 1.22) | 606                   | 0.63 (0.12, 3.42)  | 836           | 0.81 (0.22, 2.90) | 854                              | 0.21 (-0.16, 0.57)  |
| PFNA            |                                          |                      |                                        |                   |                                        |                   |                       |                    |               |                   |                                  |                     |
| 1 <sup>st</sup> | 1195                                     | -0.35 (-0.55, -0.15) | 1035                                   | 1.45 (0.75, 2.81) | 1082                                   | 0.44 (0.24, 0.80) | 978                   | 2.33 (0.48, 11.22) | 1176          | 1.08 (0.57, 2.05) | 1197                             | -0.18 (-0.58, 0.22) |
| 2 <sup>nd</sup> | 1181                                     | -0.18 (-0.38, 0.02)  | 1050                                   | 0.84 (0.43, 1.61) | 1066                                   | 0.72 (0.38, 1.37) | 951                   | 1.48 (0.29, 7.56)  | 1081          | 1.26 (0.62, 2.57) | 1182                             | -0.14 (-0.48, 0.20) |
| 3 <sup>rd</sup> | 854                                      | -0.09 (-0.31, 0.14)  | 782                                    | 0.74 (0.35, 1.56) | 762                                    | 0.60 (0.25, 1.44) | 606                   | 2.24 (0.35, 14.18) | 836           | 2.20 (0.88, 5.48) | 854                              | -0.12 (-0.43, 0.19) |
| PFHxS           |                                          |                      |                                        |                   |                                        |                   |                       |                    |               |                   |                                  |                     |
| 1 <sup>st</sup> | 1195                                     | -0.01 (-0.21, 0.20)  | 1035                                   | 1.78 (0.88, 3.60) | 1082                                   | 1.22 (0.69, 2.18) | 978                   | 2.26 (0.55, 9.30)  | 1176          | 1.05 (0.51, 2.14) | 1197                             | -0.08 (-0.49, 0.32) |
| 2 <sup>nd</sup> | 1181                                     | -0.12 (-0.31, 0.07)  | 1050                                   | 0.94 (0.49, 1.82) | 1066                                   | 0.60 (0.32, 1.11) | 951                   | 0.85 (0.15, 4.74)  | 1081          | 1.21 (0.58, 2.54) | 1182                             | -0.05 (-0.38, 0.28) |
| 3 <sup>rd</sup> | 854                                      | -0.06 (-0.29, 0.16)  | 782                                    | 1.17 (0.56, 2.44) | 762                                    | 0.60 (0.25, 1.45) | 606                   | 0.96 (0.19, 4.79)  | 836           | 0.66 (0.21, 2.06) | 854                              | 0.16 (-0.16, 0.47)  |
| PFDA            |                                          |                      |                                        |                   |                                        |                   |                       |                    |               |                   |                                  |                     |
| 1 <sup>st</sup> | 1154                                     | -0.38 (-0.56, -0.20) | 995                                    | 1.17 (0.66, 2.06) | 1046                                   | 0.29 (0.16, 0.53) | 942                   | 2.21 (0.66, 7.39)  | 1135          | 1.36 (0.75, 2.44) | 1156                             | -0.15 (-0.51, 0.21) |
| 2 <sup>nd</sup> | 1170                                     | -0.19 (-0.39, -0.00) | 1039                                   | 1.02 (0.54, 1.94) | 1055                                   | 0.82 (0.43, 1.58) | 951                   | 4.27 (0.93, 19.57) | 1070          | 1.12 (0.55, 2.28) | 1171                             | -0.21 (-0.55, 0.12) |
| 3 <sup>rd</sup> | 854                                      | -0.08 (-0.32, 0.17)  | 782                                    | 1.11 (0.48, 2.55) | 762                                    | 1.05 (0.43, 2.60) | 606                   | 4.83 (0.75, 31.02) | 836           | 0.67 (0.21, 2.10) | 854                              | 0.19 (-0.15, 0.53)  |

<sup>a</sup> Appropriate-for-gestational-age is the referent from both small- and large-for-gestational age estimates.

Models were adjusted for cohort (dummy variables), maternal race/ethnicity (Hispanic, non-Hispanic White, Black, Asian, other), for maternal educational attainment (<high school, high school degree/GED, some college, Bachelor's degree or higher), maternal age at delivery (<25, 25-29, 30-34, ≥35 years), parity (0, 1+).

PFAS, per- and polyfluoroalkyl substances; PFOA, perfluorooctanoic acid; PFOS, perfluorooctanesulfonic acid; PFNA, perfluorononanoic acid; PFHxS, perfluorohexane sulfonic acid; PFDA, perfluorodecanoic acid.

Table S8. Associations of quartiles of prenatal PFAS concentrations (ng/mL) and risk of adverse birth outcomes in selected ECHO cohorts

|                              | <b>Birthweight-for-gestational-age z-scores</b> | <b>Small-for-gestational-age*</b> | <b>Large-for-gestational-age*</b> | <b>Term low birth weight</b> | <b>Preterm birth</b> | <b>Gestational age at delivery (weeks)</b> |
|------------------------------|-------------------------------------------------|-----------------------------------|-----------------------------------|------------------------------|----------------------|--------------------------------------------|
|                              | Beta (95%CI)                                    | OR (95%CI)                        | OR (95%CI)                        | OR (95%CI)                   | OR (95%CI)           | Beta (95%CI)                               |
| <b>PFOA</b>                  |                                                 |                                   |                                   |                              |                      |                                            |
| Quartile 1<br>[-1.61, -0.22] | 0 (ref)                                         | 1 (ref)                           | 1 (ref)                           | 1 (ref)                      | 1 (ref)              | 0 (ref)                                    |
| Quartile 2<br>[-0.22, 0.08]  | -0.07 (-0.19, 0.04)                             | 1.38 (0.95, 2.01)                 | 1.02 (0.70, 1.49)                 | 0.94 (0.39, 2.27)            | 1.18 (0.76, 1.84)    | -0.01 (-0.21, 0.20)                        |
| Quartile 3<br>[0.08, 0.49]   | -0.08 (-0.21, 0.04)                             | 1.00 (0.65, 1.53)                 | 0.85 (0.55, 1.31)                 | 0.82 (0.30, 2.19)            | 1.45 (0.90, 2.35)    | -0.02 (-0.25, 0.20)                        |
| Quartile 4<br>[0.49, 0.61]   | -0.17 (-0.38, 0.05)                             | 1.62 (0.76, 3.43)                 | 1.08 (0.55, 2.11)                 | 1.29 (0.23, 7.29)            | 2.87 (1.28, 6.44)    | -0.31 (-0.69, 0.07)                        |
|                              | N=3099                                          | N=2752                            | N=2791                            | N=2815                       | N=3063               | N=3102                                     |
| <b>PFOS</b>                  |                                                 |                                   |                                   |                              |                      |                                            |
| Quartile 1<br>[-1.84, 0.20]  | 0 (ref)                                         | 1 (ref)                           | 1 (ref)                           | 1 (ref)                      | 1 (ref)              | 0 (ref)                                    |
| Quartile 2<br>[0.20, 0.46]   | -0.01 (-0.11, 0.10)                             | 0.86 (0.60, 1.22)                 | 0.89 (0.63, 1.27)                 | 0.87 (0.34, 2.19)            | 0.89 (0.60, 1.33)    | -0.04 (-0.23, 0.14)                        |
| Quartile 3<br>[0.46, 1.08]   | -0.12 (-0.23, -0.01)                            | 1.14 (0.80, 1.62)                 | 0.86 (0.58, 1.28)                 | 1.63 (0.69, 3.84)            | 0.96 (0.62, 1.47)    | -0.07 (-0.26, 0.13)                        |
| Quartile 4<br>[1.08, 2.18]   | -0.25 (-0.53, 0.02)                             | 1.73 (0.61, 4.92)                 | 0.63 (0.30, 1.34)                 | 2.81 (0.35, 22.34)           | 2.22 (0.68, 7.17)    | -0.42 (-0.90, 0.06)                        |
|                              | N=3099                                          | N=2752                            | N=2791                            | N=2815                       | N=3063               | N=3102                                     |
| <b>PFNA</b>                  |                                                 |                                   |                                   |                              |                      |                                            |
| Quartile 1<br>[-1.85, -0.62] | 0 (ref)                                         | 1 (ref)                           | 1 (ref)                           | 1 (ref)                      | 1 (ref)              | 0 (ref)                                    |
| Quartile 2<br>[-0.62, -0.40] | 0.01 (-0.10, 0.13)                              | 0.83 (0.58, 1.20)                 | 0.87 (0.61, 1.26)                 | 0.79 (0.32, 1.94)            | 1.32 (0.87, 2.01)    | 0.01 (-0.19, 0.21)                         |
| Quartile 3<br>[-0.40, -0.15] | -0.11 (-0.23, 0.00)                             | 0.89 (0.60, 1.31)                 | 0.70 (0.48, 1.04)                 | 1.10 (0.45, 2.69)            | 0.96 (0.60, 1.54)    | 0.09 (-0.12, 0.30)                         |
| Quartile 4<br>[-0.15, 1.13]  | -0.24 (-0.37, -0.10)                            | 1.19 (0.77, 1.84)                 | 0.51 (0.33, 0.81)                 | 1.88 (0.70, 5.04)            | 1.74 (1.05, 2.89)    | -0.18 (-0.42, 0.06)                        |
|                              | N=3099                                          | N=2752                            | N=2791                            | N=2815                       | N=3063               | N=3102                                     |
| <b>PFHxS</b>                 |                                                 |                                   |                                   |                              |                      |                                            |
| Quartile 1<br>[-1.90, -0.25] | 0 (ref)                                         | 1 (ref)                           | 1 (ref)                           | 1 (ref)                      | 1 (ref)              | 0 (ref)                                    |
| Quartile 2<br>[-0.25, 0.00]  | 0.02 (-0.09, 0.13)                              | 1.02 (0.70, 1.49)                 | 0.99 (0.69, 1.42)                 | 0.57 (0.23, 1.44)            | 1.09 (0.70, 1.70)    | 0.01 (-0.19, 0.20)                         |
| Quartile 3<br>[0.00, 0.28]   | -0.07 (-0.19, 0.05)                             | 1.21 (0.81, 1.79)                 | 0.79 (0.52, 1.20)                 | 0.84 (0.34, 2.06)            | 0.92 (0.57, 1.49)    | 0.04 (-0.17, 0.25)                         |
| Quartile 4<br>[0.28, 1.51]   | -0.07 (-0.21, 0.08)                             | 1.38 (0.87, 2.19)                 | 0.89 (0.56, 1.42)                 | 1.21 (0.44, 3.38)            | 1.23 (0.71, 2.15)    | -0.09 (-0.34, 0.16)                        |

|                              | N=3099               | N=2752            | N=2791            | N=2815            | N=3063            | N=3102              |
|------------------------------|----------------------|-------------------|-------------------|-------------------|-------------------|---------------------|
| <b>PFDA</b>                  |                      |                   |                   |                   |                   |                     |
| Quartile 1<br>[-1.85, -1.15] | 0 (ref)              | 1 (ref)           | 1 (ref)           | 1 (ref)           | 1 (ref)           | 0 (ref)             |
| Quartile 2<br>[-1.15, -1.00] | -0.05 (-0.17, 0.07)  | 0.77 (0.51, 1.15) | 0.78 (0.52, 1.17) | 0.70 (0.24, 2.06) | 1.44 (0.90, 2.29) | -0.03 (-0.24, 0.18) |
| Quartile 3<br>[-1.00, -0.70] | -0.10 (-0.20, 0.00)  | 0.82 (0.58, 1.15) | 0.78 (0.57, 1.07) | 0.74 (0.30, 1.81) | 1.09 (0.74, 1.61) | 0.01 (-0.16, 0.19)  |
| Quartile 4<br>[-0.70, 0.52]  | -0.26 (-0.37, -0.16) | 1.28 (0.91, 1.81) | 0.58 (0.41, 0.82) | 2.28 (1.09, 4.77) | 1.36 (0.91, 2.03) | -0.13 (-0.32, 0.06) |
|                              | N=3047               | N=2701            | N=2744            | N=2770            | N=3011            | N=3050              |

<sup>a</sup>Appropriate-for-gestational-age is the referent from both small- and large-for-gestational age estimates.

Beta coefficients ( $\beta$ ) and odds ratios (ORs) represent a difference between stated quartile and lowest (first quartile) in PFAS concentration (ng/mL) and are presented with 95% confidence intervals (CI). Models were adjusted for cohort, maternal race/ethnicity (Hispanic, non-Hispanic White, Black, Asian, other), for maternal educational attainment (<high school, high school degree/GED, some college, Bachelor's degree or higher), maternal age at delivery (<25, 25-29, 30-34,  $\geq$ 35 years), parity (0, 1+).

PFAS, per- and polyfluoroalkyl substances; PFOA, perfluorooctanoic acid; PFOS, perfluorooctanesulfonic acid; PFNA, perfluorononanoic acid; PFHxS, perfluorohexane sulfonic acid; PFDA, perfluorodecanoic acid.

Table S9. Mixed versus fixed effects models of continuous measures of prenatal natural log-transformed PFAS (ng/mL) concentrations and birthweight-for-gestational age Z-scores in selected ECHO cohorts.

| PFAS                       | Birthweight-for-gestational-age z-scores |                      |
|----------------------------|------------------------------------------|----------------------|
|                            | N                                        | $\beta$ (95% CI)     |
| PFOA                       |                                          |                      |
| Mixed effects <sup>1</sup> | 3099                                     | -0.13 (-0.24, -0.02) |
| Fixed effects              | 3099                                     | -0.15 (-0.27, -0.03) |
| PFOS                       |                                          |                      |
| Mixed effects <sup>1</sup> | 3099                                     | -0.11 (-0.24, 0.02)  |
| Fixed effects              | 3099                                     | -0.14 (-0.28, 0.00)  |
| PFNA                       |                                          |                      |
| Mixed effects <sup>1</sup> | 3099                                     | -0.20 (-0.32, -0.09) |
| Fixed effects              | 3099                                     | -0.22 (-0.33, -0.10) |
| PFHxS                      |                                          |                      |
| Mixed effects <sup>1</sup> | 3099                                     | -0.07 (-0.18, 0.05)  |
| Fixed effects              | 3099                                     | -0.06 (-0.18, 0.06)  |
| PFDA                       |                                          |                      |
| Mixed effects <sup>1</sup> | 3047                                     | -0.24 (-0.36, -0.13) |
| Fixed effects              | 3047                                     | -0.25 (-0.37, -0.14) |

<sup>a</sup> Mixed models include cohort as a random effect (fixed models are presented as Model 2 in Table 2)

Beta coefficients ( $\beta$ ) represent 1 log-unit increase in PFAS concentration (ng/mL) and are presented with 95% confidence intervals (CI).

Models adjusted for cohort, maternal race/ethnicity (Hispanic, non-Hispanic White, Black, Asian, other), for maternal educational attainment (<high school, high school degree/GED, some college, Bachelor's degree or higher), maternal age at delivery (<25, 25-29, 30-34,  $\geq$ 35 years), parity (0, 1+).

PFAS, per- and polyfluoroalkyl substances; PFOA, perfluorooctanoic acid; PFOS, perfluorooctanesulfonic acid; PFNA, perfluorononanoic acid; PFHxS, perfluorohexane sulfonic acid; PFDA, perfluorodecanoic acid.

Table S10. Associations of prenatal natural log-transformed PFAS concentrations (ng/mL) and risk of adverse birth outcomes additionally adjusted for tobacco smoke exposure (via maternal smoking or second-hand smoke) in selected ECHO cohorts

| PFAS  | Birthweight-for-gestational age z-score |                      | Large-for-gestational age <sup>a</sup> |                   |
|-------|-----------------------------------------|----------------------|----------------------------------------|-------------------|
|       | N                                       | $\beta$ (95% CI)     | N                                      | OR (95% CI)       |
| PFOA  | 2702                                    | -0.17 (-0.30, -0.04) | 2702                                   | 1.15 (0.95, 1.39) |
| PFOS  | 2702                                    | -0.16 (-0.31, -0.02) | 2702                                   | 1.40 (1.15, 1.70) |
| PFNA  | 2702                                    | -0.26 (-0.39, -0.14) | 2702                                   | 0.86 (0.67, 1.11) |
| PFHxS | 2702                                    | -0.09 (-0.22, 0.03)  | 2702                                   | 1.09 (0.84, 1.42) |
| PFDA  | 2650                                    | -0.27 (-0.39, -0.14) | 2650                                   | 0.65 (0.47, 0.89) |

<sup>a</sup> Appropriate-for-gestational-age is the referent from large-for-gestational age estimates.

Adjusted for cohort, maternal race/ethnicity (Hispanic, non-Hispanic White, Black, Asian, other), maternal educational attainment (<high school, high school degree/GED, some college, Bachelor's degree or higher), maternal age at delivery (<25, 25-29, 30-34,  $\geq$ 35 years), parity (0, 1+), prenatal tobacco smoke exposure (either maternal smoking or second-hand smoke).

PFAS, per- and polyfluoroalkyl substances; PFOA, perfluorooctanoic acid; PFOS, perfluorooctanesulfonic acid; PFNA, perfluorononanoic acid; PFHxS, perfluorohexane sulfonic acid; PFDA, perfluorodecanoic acid.

Table S11. Associations of non-log transformed prenatal PFAS concentrations (ng/mL) and birthweight in selected ECHO cohorts

| PFAS  | N    | $\beta$ (95% CI)       |
|-------|------|------------------------|
| PFOA  | 3102 | -5.48 (-24.22, 13.27)  |
| PFOS  | 3102 | -12.77 (-30.60, 5.05)  |
| PFNA  | 3102 | -15.99 (-29.77, -2.22) |
| PFHXS | 3102 | -1.36 (-12.44, 9.73)   |
| PFDA  | 3050 | -15.76 (-26.81, -4.71) |

Beta coefficients ( $\beta$ ) represent a change in birthweight (grams) for a difference in interquartile range of PFAS concentration (ng/mL, not log transformed) and are presented with 95% confidence intervals (CI). Models were adjusted for cohort, maternal race/ethnicity (Hispanic, non-Hispanic White, Black, Asian, other), for maternal educational attainment (<high school, high school degree/GED, some college, Bachelor's degree or higher), maternal age at delivery (<25, 25-29, 30-34,  $\geq$ 35 years), parity (0, 1+), and gestational age at delivery. PFAS, per- and polyfluoroalkyl substances; PFOA, perfluorooctanoic acid; PFOS, perfluorooctanesulfonic acid; PFNA, perfluorononanoic acid; PFHxS, perfluorohexane sulfonic acid; PFDA, perfluorodecanoic acid.

Figure S1. Flow chart for eligibility of study population of selected ECHO cohorts

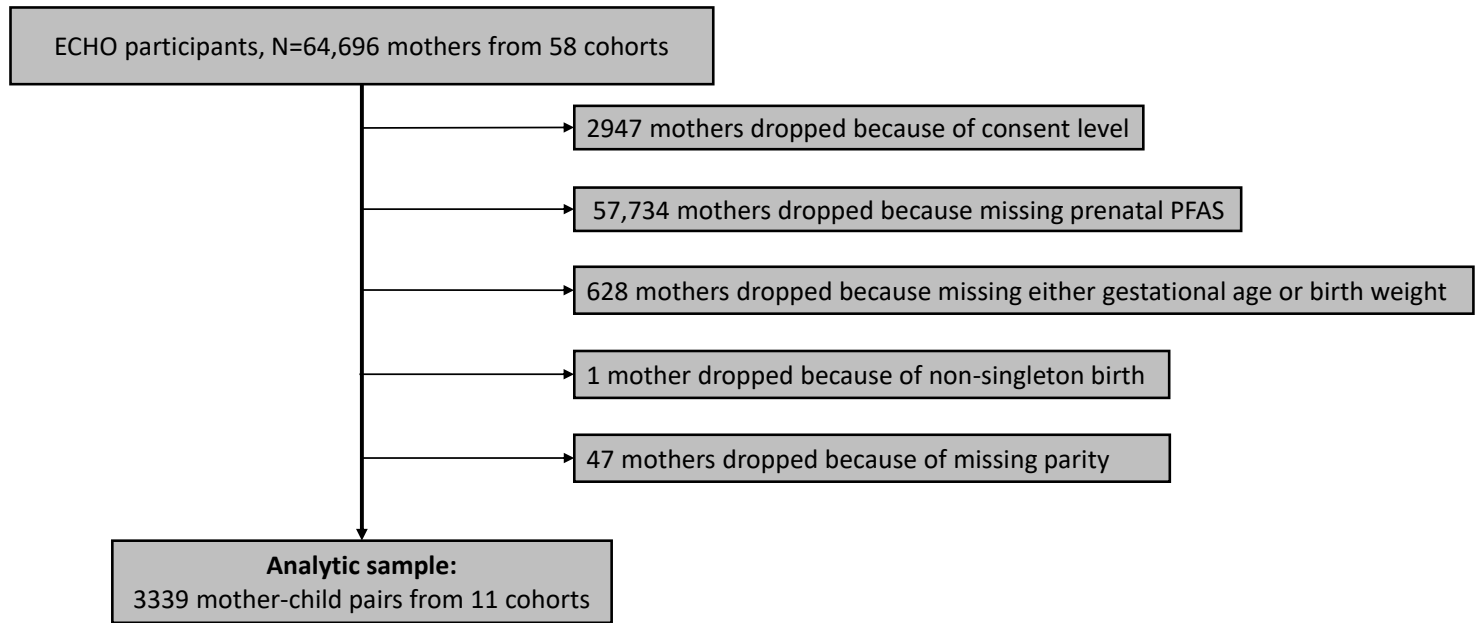



Figure S2. Raw (above) and natural log transformed (below) distributions of PFAS (ng/mL) in selected ECHO cohorts (N=3339). See Table S5 for corresponding numeric data.

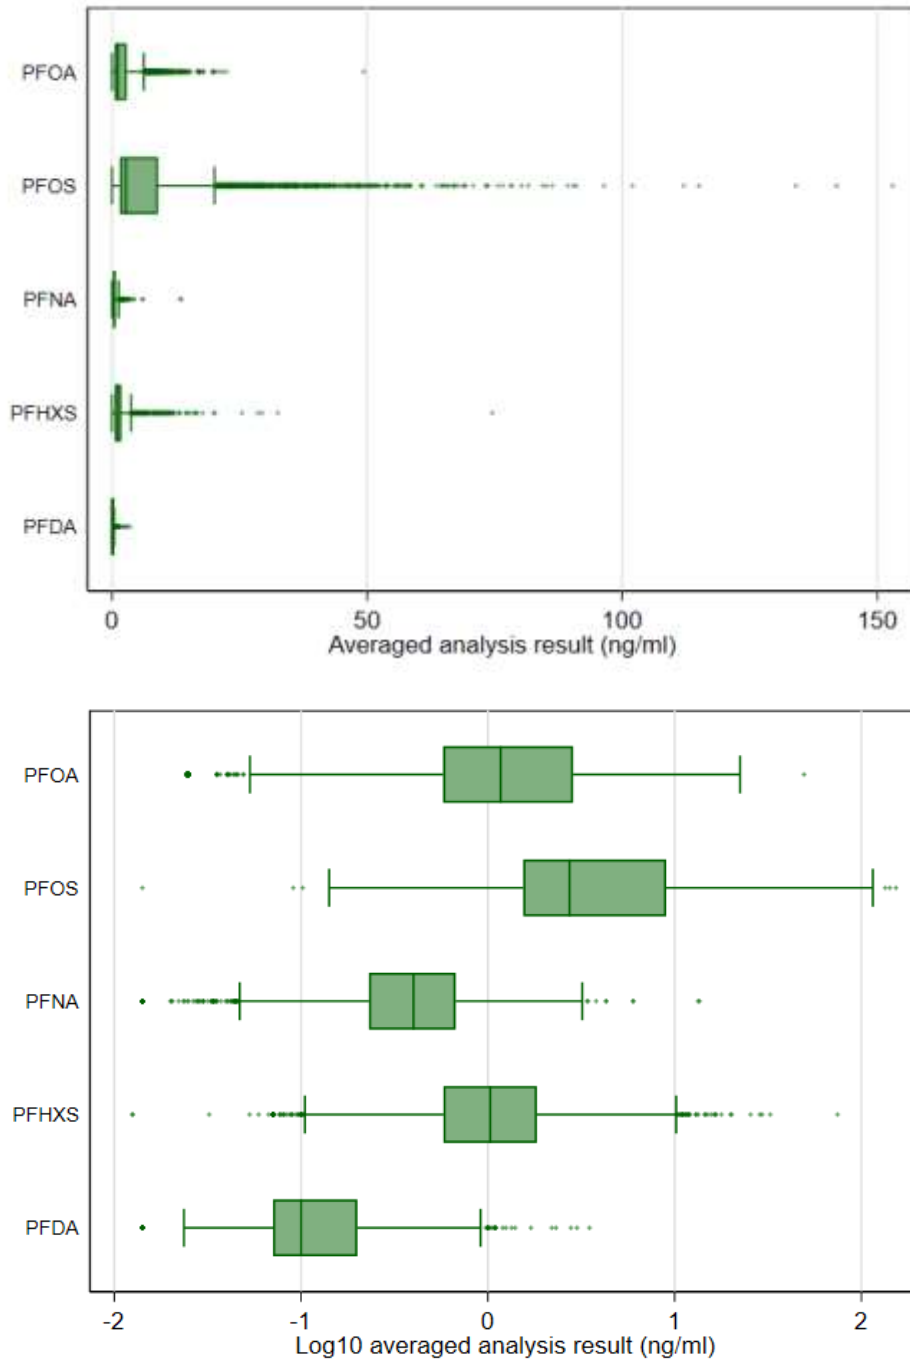

PFAS, per- and polyfluoroalkyl substances; PFOA, perfluorooctanoic acid; PFOS, perfluorooctanesulfonic acid; PFNA, perfluorononanoic acid; PFHxS, perfluorohexane sulfonic acid; PFDA, perfluorodecanoic acid.

Figure S3. Directed Acyclic Graph

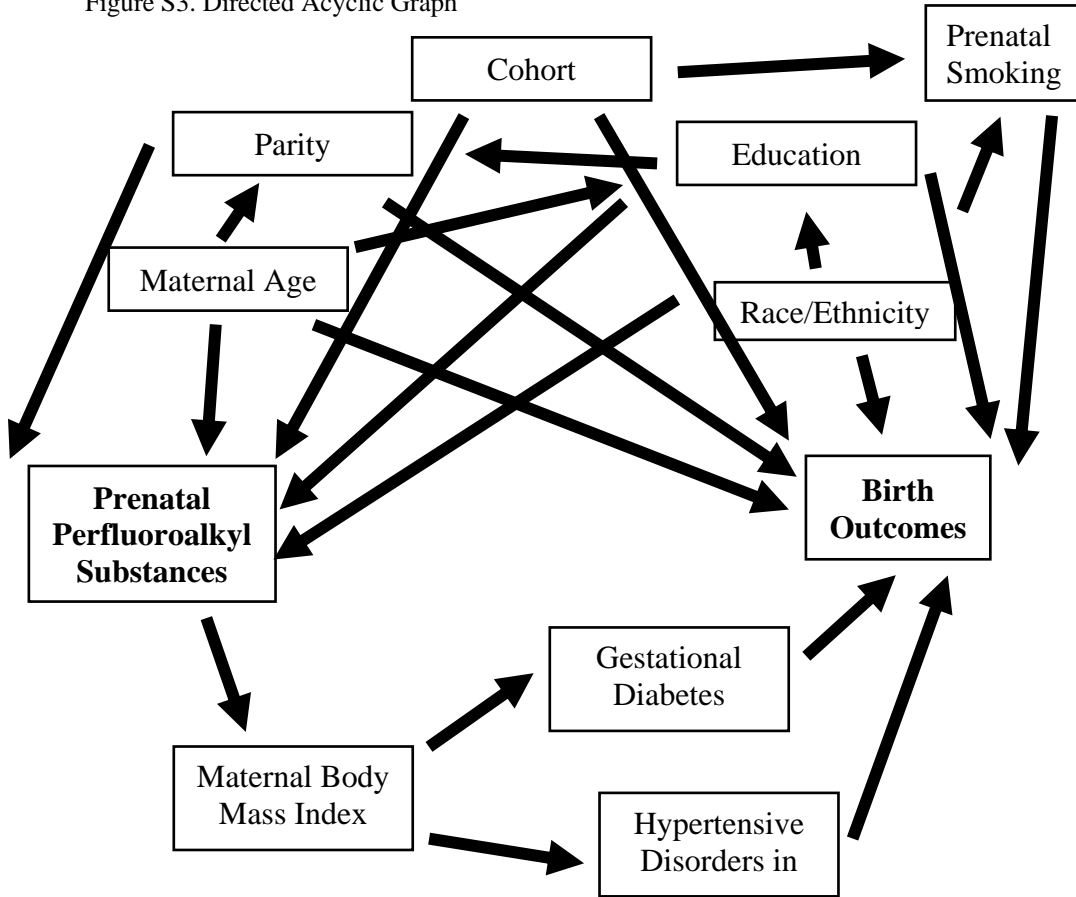

Figure S4. Spearman correlation for PFAS concentrations (ng/mL) in selected ECHO cohorts (N=3339)

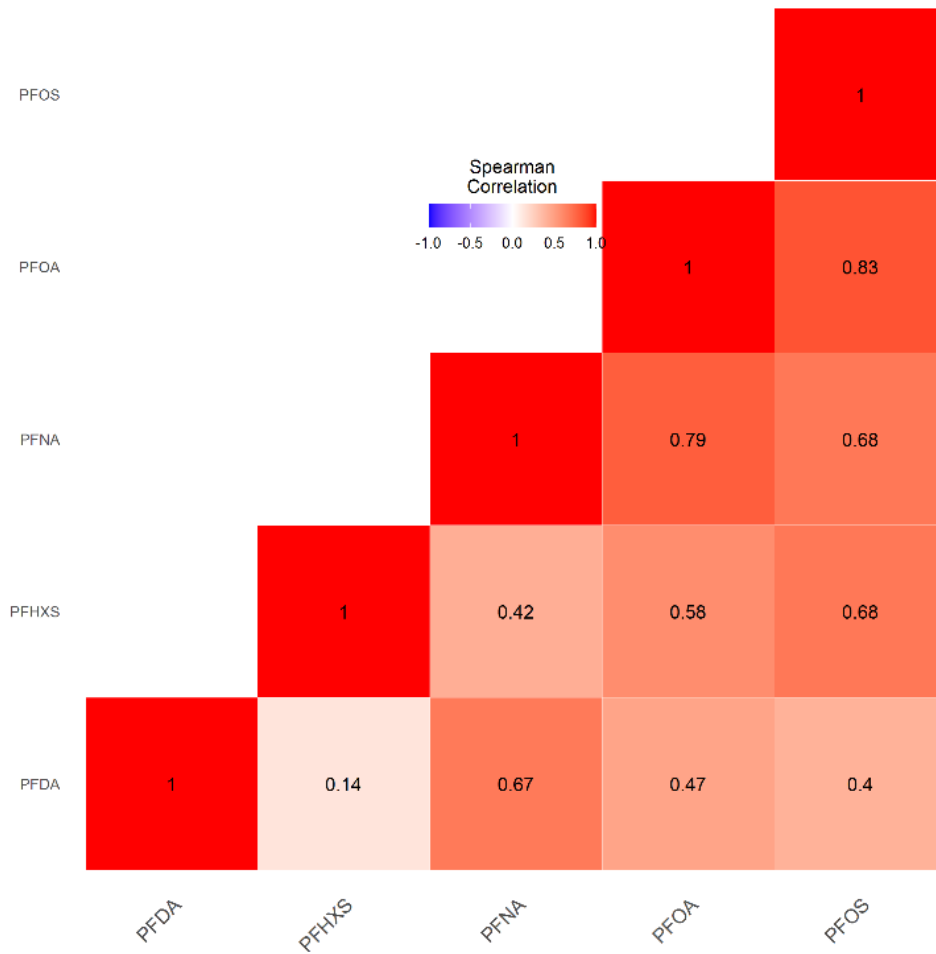

PFAS, per- and polyfluoroalkyl substances; PFOA, perfluorooctanoic acid; PFOS, perfluorooctanesulfonic acid; PFNA, perfluorononanoic acid; PFHxS, perfluorohexane sulfonic acid; PFDA, perfluorodecanoic acid

Figure S5. Associations of prenatal natural log transformed PFAS concentrations (ng/mL) and risk of adverse birth outcomes with each cohort removed one at a time in selected ECHO cohorts (N=3339)

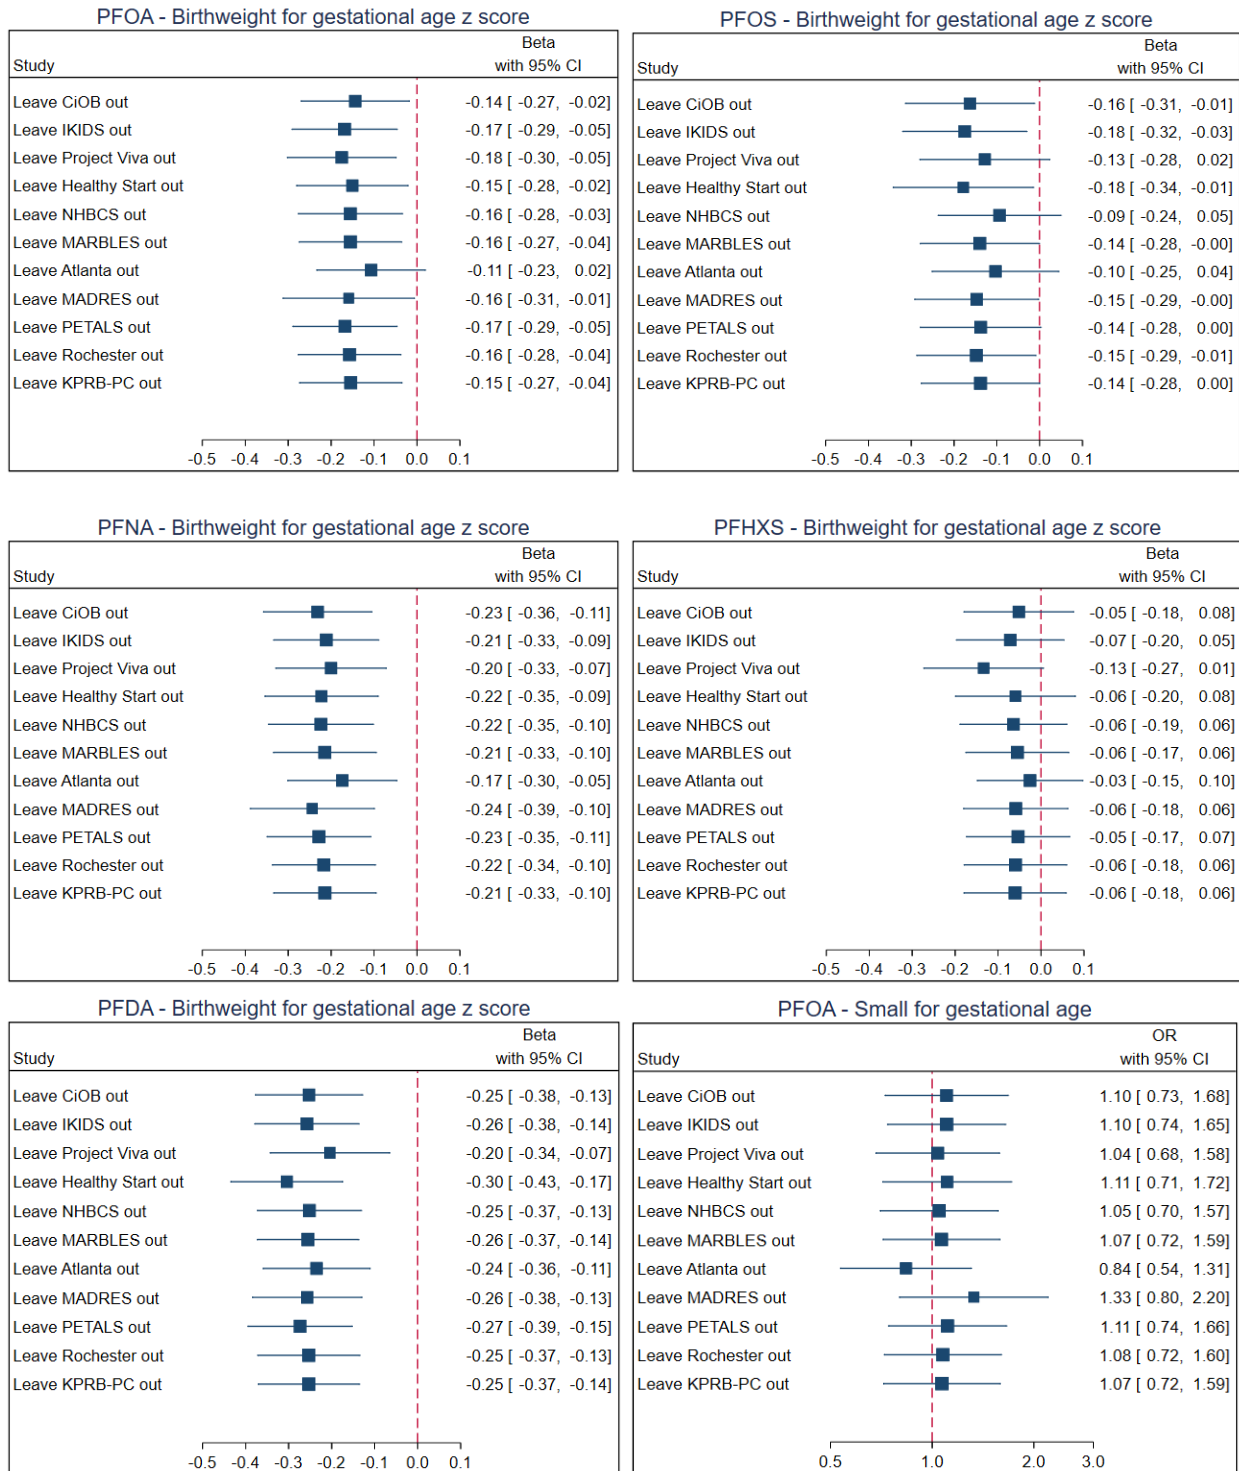

PFOS - Small for gestational age

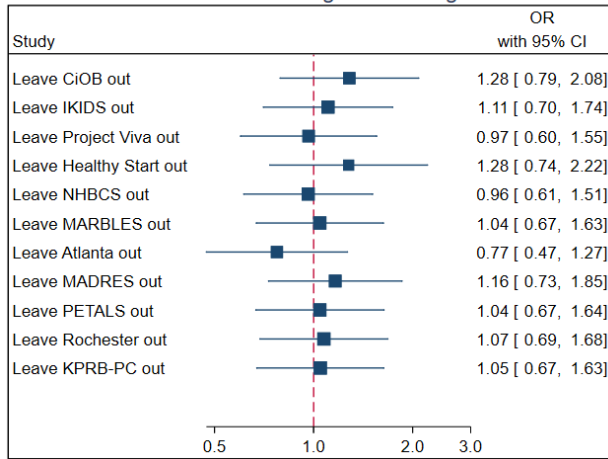

PFNA - Small for gestational age

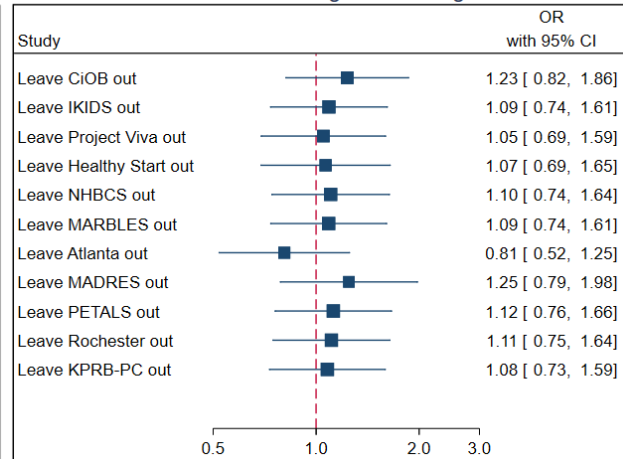

PFHXS - Small for gestational age

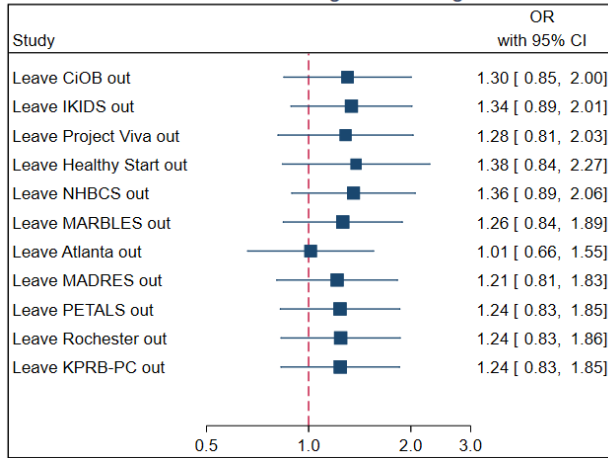

PFDA - Small for gestational age

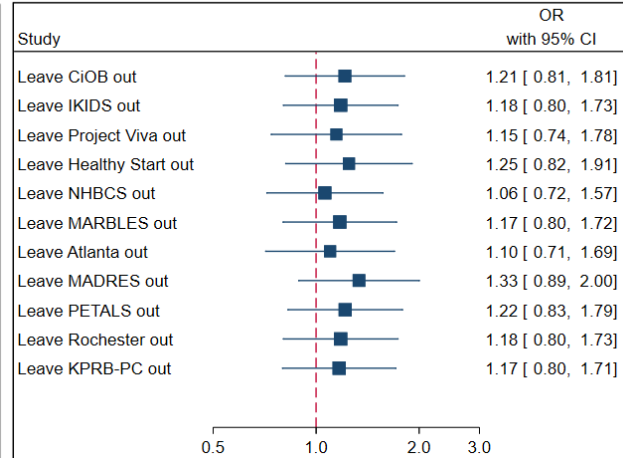

PFOA - Large for gestational age

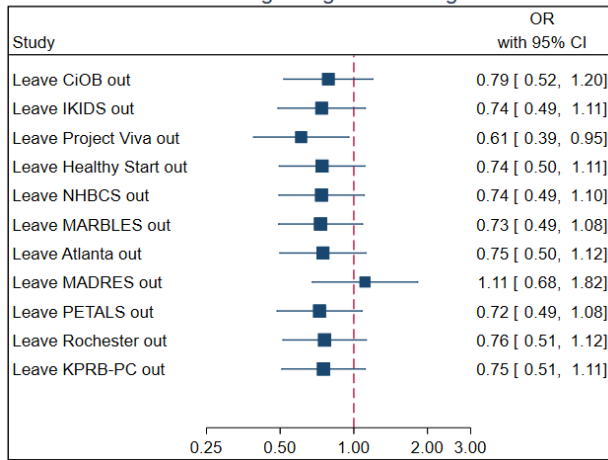

PFOS - Large for gestational age

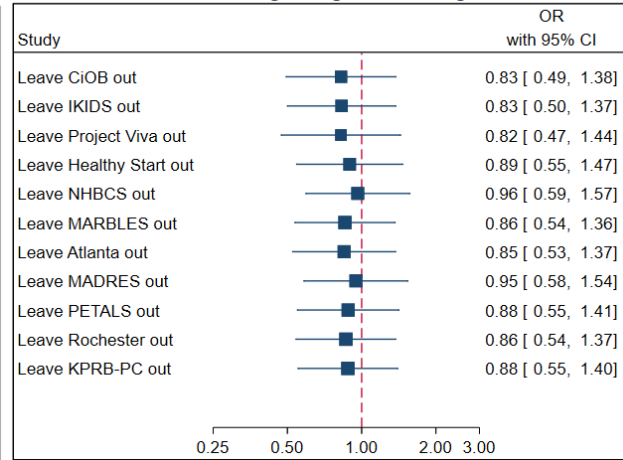

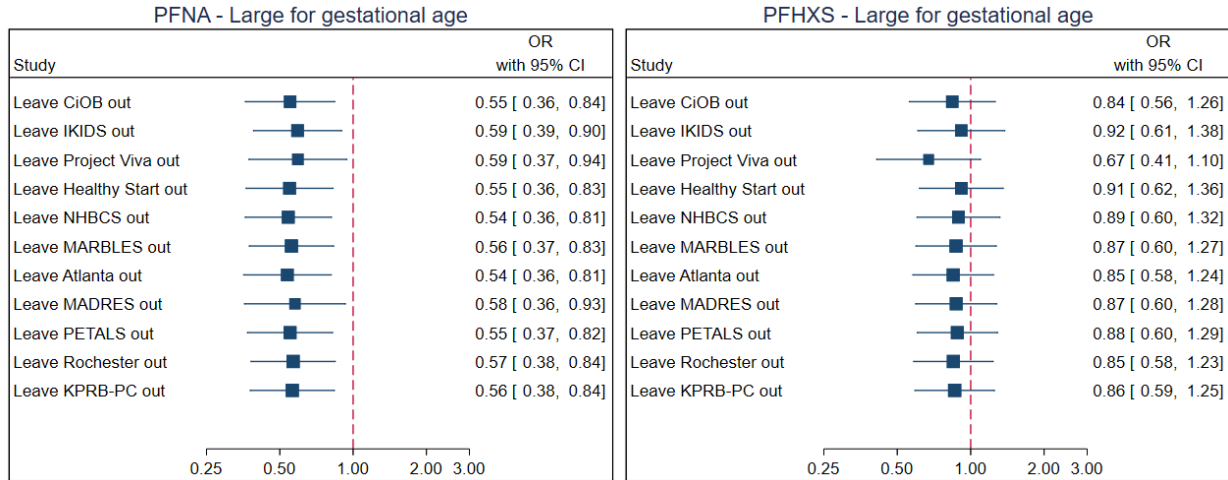

PFAS, per- and polyfluoroalkyl substances; PFOA, perfluorooctanoic acid; PFOS, perfluorooctanesulfonic acid; PFNA, perfluorononanoic acid; PFHxS, perfluorohexane sulfonic acid; PFDA, perfluorodecanoic acid  
 Chemicals in Our Bodies (CiOB); Illinois Kids Development Studies (IKIDS); New Hampshire Birth Cohort Study (NHBCS); Markers of Autism Risk in Babies Learning Early Signs (MARBLES); Emory (Atlanta); Maternal And Developmental Risks from Environmental and social Stressors (MADRES); Pregnancy and Environment And Lifestyle Study (PETALS); Kaiser Permanente Research Bank Pregnancy Cohort (KPRB-PC)

Sample size (n) for analyses of birthweight-for-gestational age z-score with leaving out the following cohorts: CiOB, IKIDS, Project Viva, Healthy Start, NHBCS, MARBLES, Atlanta, MADRES, PETALS, Rochester, KPRB-PC for the analytes PFOA, PFOS, PFNA, PHFXS are 2711, 2915, 2282, 2448, 2812, 3063, 2856, 2769, 2975, 3067, 3092, respectively, and for PFDA are 2659, 2863, 2230, 2396, 2760, 3011, 2856, 2717, 2923, 3015, 3040, respectively.

Sample size (n) for analyses of SGA with leaving out the following cohorts: CiOB, IKIDS, Project Viva, Healthy Start, NHBCS, MARBLES, Atlanta, MADRES, PETALS, Rochester, KPRB-PC for the analytes PFOA, PFOS, PFNA, PHFXS are 2411, 2608, 2068, 2130, 2497, 2722, 2519, 2456, 2641, 2722, 2746, respectively, and for PFDA are 2360, 2557, 2017, 2079, 2446, 2671, 2519, 2405, 2590, 2671, 2695, respectively.

Sample size (n) for analyses of LGA with leaving out the following cohorts: CiOB, IKIDS, Project Viva, Healthy Start, NHBCS, MARBLES, Atlanta, MADRES, PETALS, Rochester, KPRB-PC for the analytes PFOA, PFOS, PFNA, PHFXS are 2436, 2614, 2034, 2231, 2523, 2757, 2596, 2491, 2675, 2767, 2786, respectively, and for PFDA are 2389, 2567, 1987, 2184, 2476, 2710, 2596, 2444, 2628, 2720, 2739, respectively.

Figure S6. Associations between second, third and fourth quartiles of maternal PFAS (ng/mL) compared to the first quartile (lowest) and risk of adverse birth outcomes in 11 selected ECHO cohorts. Shapes represent point estimate, and lines represent corresponding 95% confidence intervals. See Table S8 for corresponding numeric data.

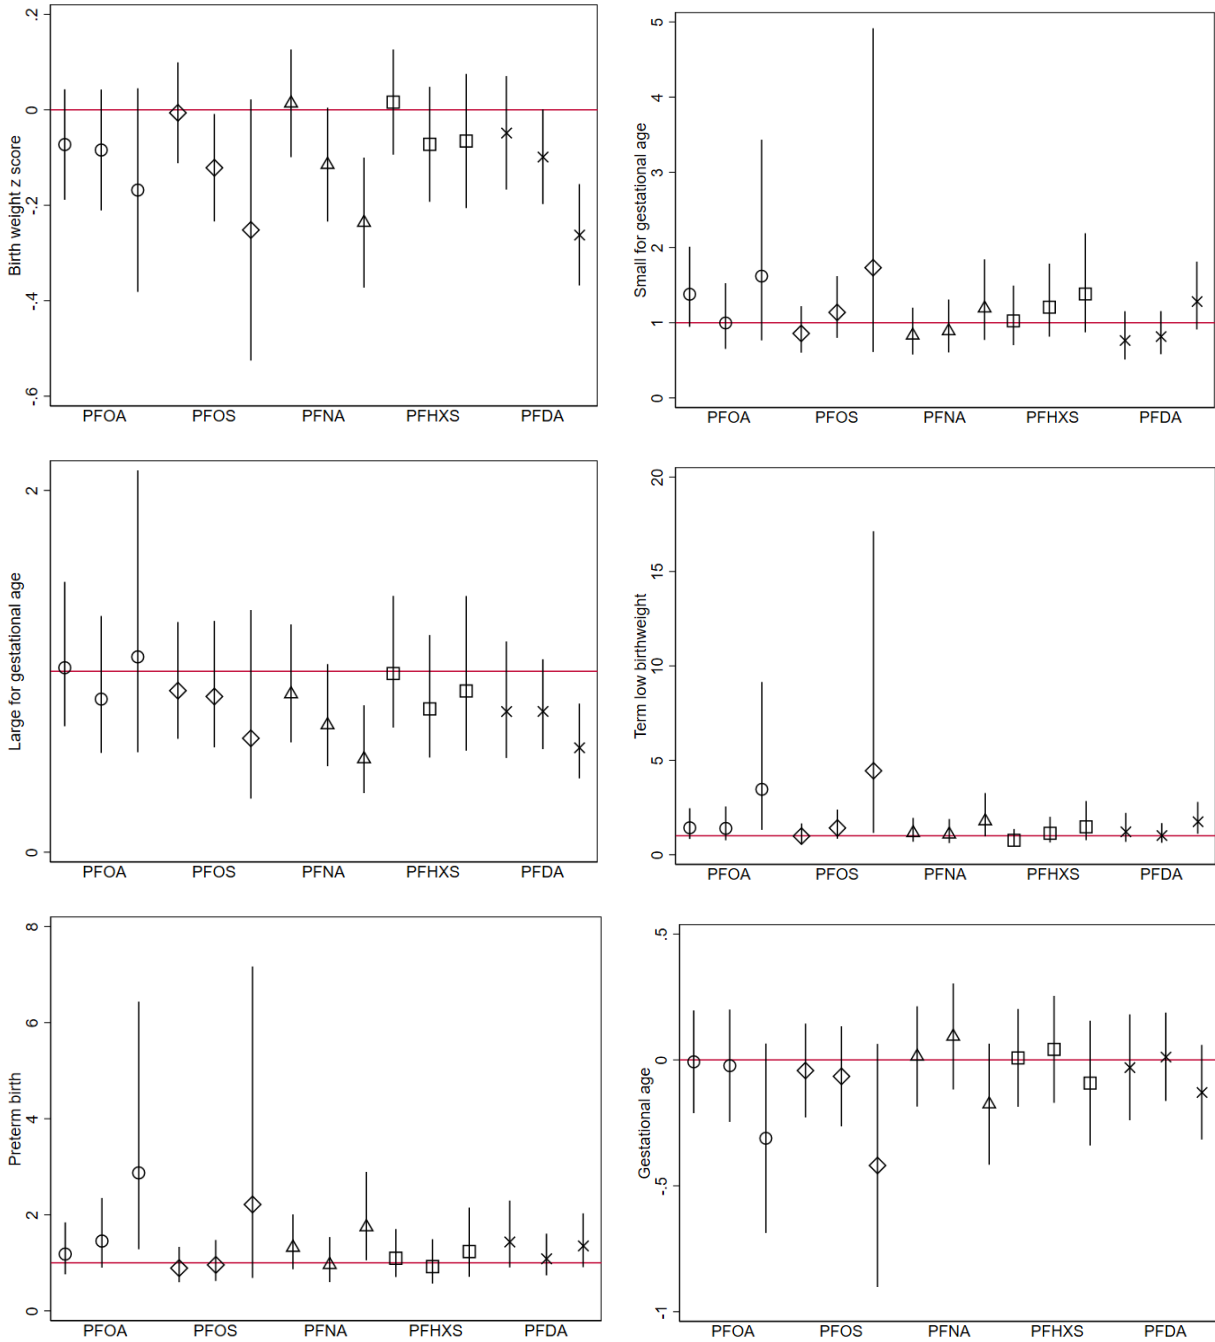

PFAS, per- and polyfluoroalkyl substances; PFOA, perfluorooctanoic acid; PFOS, perfluorooctanesulfonic acid; PFNA, perfluorononanoic acid; PFHxS, perfluorohexane sulfonic acid; PFDA, perfluorodecanoic acid.

## References

Eick SM, Enright EA, Geiger SD, Dzwilewski KLC, DeMicco E, Smith S, et al. 2021. Associations of maternal stress, prenatal exposure to per- and polyfluoroalkyl substances (pfas), and demographic risk factors with birth outcomes and offspring neurodevelopment: An overview of the echo.Ca.II prospective birth cohorts. *Int J Environ Res Public Health* 18.

Honda M, Robinson M, Kannan K. 2018. A rapid method for the analysis of perfluorinated alkyl substances in serum by hybrid solid-phase extraction. *Environmental Chemistry* 15:92-99.

Kato K, Basden BJ, Needham LL, Calafat AM. 2011. Improved selectivity for the analysis of maternal serum and cord serum for polyfluoroalkyl chemicals. *J Chromatogr A* 1218:2133-2137.

Oh J, Bennett DH, Calafat AM, Tancredi D, Roa DL, Schmidt RJ, et al. 2021. Prenatal exposure to per- and polyfluoroalkyl substances in association with autism spectrum disorder in the marbles study. *Environment international* 147:106328.

Sagiv SK, Rifas-Shiman SL, Fleisch AF, Webster TF, Calafat AM, Ye X, et al. 2018. Early-pregnancy plasma concentrations of perfluoroalkyl substances and birth outcomes in project viva: Confounded by pregnancy hemodynamics? *Am J Epidemiol* 187:793-802.
